# Supplementary material
Source: Springer Nature journal article supplement (https://www.springermedizin.de/resource/supplementary/13075_2012_3638_MOESM2_ESM.pdf/9694974)

# Inclusion Body Plot

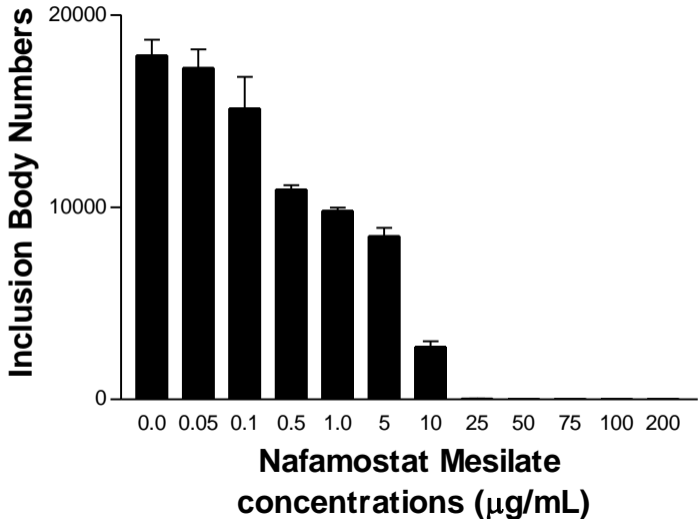

Supplement: MOESM2 [file 9694974]
